# Supplementary material
Source: publisher figshare collection journal article supplement (https://geolsoc.figshare.com/ndownloader/files/25283220)
Supplement: Supplementary file 1 [file 25283220]

## Sheet: TableS2
Table S2. Analyses of lavas from the James Ross Island Volcanic Group and Antarctic Peninsula post-subduction lavas
Sample	Rock type/Long	location		Latitude	Longitude	Age (Ma)	Error	lit. source		SiO2	TiO2	Al2O3	Fe2O3	FeO	MnO	MgO	CaO	Na2O	K2O	P2O5	LOI	F	CO2	H2O+	H2O−	Total		Li	Sc	V	Cr	Co	Ni	Cu	Zn	Rb	Sr	Y	Zr	Nb	Ga	Cs	Ba	La	Ce	Pr	Nd	Sm	Eu
D.3759.1	Ol basalt		James Ross Island					18		48.1	1.72	15.95	0.38	10	0.15	8.88	8.26	3.37	1.08	0.5	0.81					99.2					260		167			12	545	25	177	25			146
D.4053.9	Hawaiite		James Ross Island					18		48.2	2.38	17.62	1.71	8.04	0.16	4.9	8.58	4.37	1.85	0.7	0.37					98.88					34		20			20	826	29	232	44			208
D.4085.7	Mugearite		James Ross Island					18		51	3.37	14.51	7.88	3.92	0.17	3.09	6.74	4.85	2.65	0.92	0.32					99.42					20		18			39	392	49	341	58			284
D.8710.4	Hawaiite	Antarctic Peninsula	James Ross Island			4.4	0.25	13		49.61	2.06	16.29	10.07		0.14	6.53	7.07	4.37	2.43	0.8						100.27					152	34.1	110			24	1018	23	257	53			301	37.3	73.9		36.6	7.37	2.37
D.8711.1	Basalt	Antarctic Peninsula	James Ross Island			4.4	0.25	13		46.74	1.91	14.51	11.55		0.15	9.91	8.65	3.08	1.39	0.44						100.83					316	49.9	222			13	666	22	180	29			158	20.1	42.5		23	4.97	1.75
D.8725.1	Basalt	Antarctic Peninsula	James Ross Island			4.4	0.25	13		47.79	1.7	14.84	12.9		0.16	9.65	8.82	3.01	0.9	0.35						100.12					308		198			14	418	24	128	21			129
D.8728.1	Hawaiite	Antarctic Peninsula	James Ross Island			5.4	0.5	13		49.68	2	16.44	9.82		0.14	5.12	7.77	4.42	2.16	0.67						99.52					104		37			35	755	24	241	44			274	36.2	59.42		26.54	5.52	1.93
D.8728.2	Ph-Tephrite	Antarctic Peninsula	James Ross Island			5.37	0.35	13		50.99	3.11	14.9	11.26		0.17	2.66	6.11	5.31	3.42	0.17						98.64					3		9			51	560	39	408	79			374	54.41	100.92		44.26	9.96	2.75
D.8730.1	Hawaiite	Antarctic Peninsula	James Ross Island			5.37	0.35	13		48.84	1.7	15.84	12.59		0.17	7.24	7.37	3.78	1.63	0.6						99.89					147	42.7	128			12	630	22	243	32			132	25.1	51.9		26	5.56	1.86
D.8749.1	Basalt	Antarctic Peninsula	James Ross Island			5.37	0.35	13		47.78	1.86	14.91	12.83		0.17	8.45	8.98	3.34	0.83	0.34						99.59					257	49.2	123			10	447	24	135	23			140	16.4	32.9		16.2	4.33	1.59
D.8814.1	Hawaiite	Antarctic Peninsula	James Ross Island			4.36	0.21	13		49.52	2.79	14.94	11.64		0.17	3.04	7.36	4.81	2.4	0.78						99.79					8		9			31	483	37	306	59			304	37	35.68		72.63	34.4	7.28
D.8818.1	Basalt	Antarctic Peninsula	James Ross Island			2.47	0.38	13		48.86	1.84	16.63	10.38		0.14	7.06	8.12	3.99	1.75	0.54						99.59					176	35.9	97			16	720	26	212	38			205	28.5	55.4		28.5	5.58	1.94
D.8819.1	Hawaiite	Antarctic Peninsula	James Ross Island			2.47	0.38	13		49.39	1.86	16.36	10.78		0.14	6.52	8.03	4.27	1.51	0.59						99.98					169	36.7	78			13	850	21	191	42			248	31.1	56.8		28.2	5.62	1.96
D.8822.1	Hawaiite	Antarctic Peninsula	James Ross Island			5.15	0.33	13		48.78	1.93	16.68	11.34		0.14	6.26	8.93	3.91	1.26	0.44						99.67					133	37.5	58			17	584	24	170	26			161	21.4	40.2		21.1	5.01	1.74
D.8826.3	Basalt	Antarctic Peninsula	James Ross Island			5.15	0.33	13		47.43	1.88	15.65	11.7		0.16	8.22	8.99	3.56	0.95	0.35						99.9					248		111			12	470	24	160	24			149	16.41	33.07		17.44	4.74	1.58
D.8827.1	Picro-Basanite	Antarctic Peninsula	James Ross Island			6.5	0.6	13		42.36	0.71	10.99	14.86		0.18	18.25	4.7	3.49	0.2	0.1						99.61					430	90.2	536			6	231	11	53	5			76	5	10.6		5.4	1.44	0.65
D.8838.1	Basanite	Antarctic Peninsula	James Ross Island			6.5	0.6	13		48.99	2.06	17.1	9.68		0.13	4.66	7.82	4.56	2.47	0.76						100.05					67		25			24	896	21	290	56			246	34.55	68.95		30.45	6.72	2.25
JR1	Basalt pillow lava		James Ross Island	63.7922	57.81			15		46.76	1.61	14.7	2.11	8.75	0.19	9.93	9.03	2.93	0.57	0.31		0.04	0.14	1.51	1.19	99.77		5.9	25.5	175	592	47.7	131	45.1		5.1	412	24.4	145	20.4		0.22	96	19.3	41.5	5.09	21	4.85	1.71
JR16	Basalt dyke		James Ross Island	63.8032	57.9517			15		45.9	1.35	15.73	2.27	7.04	0.17	7.03	6.91	4.52	2.12	0.39		0.04	0.01	5.34	0.96	99.77		n/a	25.3	165	317	34.7	59	34		20	672	23.6	164	29.1		0.57	162	28.2	56.4	6.5	24.9	5.44	1.78
JR52	Basalt pillow lava		James Ross Island	63.797	57.8008			15		46.8	1.65	15.31	2.07	8.46	0.18	9.32	8.19	3.41	1.21	0.32		0.04	0.02	2.41	0.38	99.77		6	25.1	176	504	43.1	115	42.3		11.5	584	24.9	148	21.3		0.38	106	20.1	42.3	5.39	20.9	5.02	1.69
JR53	Basalt pillow breccia		James Ross Island	63.811	57.8892			15		48.38	1.6	15.4	2.03	8.44	0.18	8.72	8.38	3.06	1.33	0.43		0.03	0.03	1.5	0.43	99.94		4.6	22.7	157	459	43.2	141	53.1		13.6	578	24.4	203	35.2		0.14	145	25	50.5	6.1	24.1	5.54	1.87
JR59	Basalt lava flow1)		James Ross Island	63.8088	57.8245			15		48.38	1.52	15.09	2.38	9.09	0.18	8.94	7.33	3.43	1.22	0.41		0.03	0.02	1.41	0.46	99.89		6.9	19.3	142	418	45.1	112	42.8		15.1	463	23.2	169	31.3		0.24	141	23.5	47	5.6	22.7	5.07	1.7
JR61A	Basalt lava flow		James Ross Island	63.8123	57.8317			15		48.51	1.47	15.48	2.61	8.79	0.18	8.53	7.75	3.55	1.37	0.4		0.04	0.02	0.99	0.15	99.84		6.3	18.8	142	431	46.6	105	42.2		17.2	522	22.7	167	30.5		0.19	138	22.3	45.2	5.57	21.4	4.91	1.66
JR61B	Basalt lava flow		James Ross Island	63.8123	57.8317			15		48.94	1.52	15.52	1.9	9.64	0.18	8.54	7.78	3.8	1.26	0.41		0.03	0.01	0.28	0.1	99.91		6.9	19.7	146	429	46.4	106	40.1		15.9	486	23.4	171	31.3		0.15	139	22.8	46.6	5.62	21.9	5.06	1.69
JR68	Basalt lava flow1)		James Ross Island	63.869	58.108			15		46.6	1.53	15.62	2.79	7.76	0.18	8.85	8.41	2.84	0.71	0.26		0.03	0.04	2.85	1.28	99.75		6.7	25.8	180	515	43.4	98	47.5		10.4	328	24.9	141	16.4		0.35	88	15	32.7	4.36	18.6	4.74	1.68
JR70	Dolerite lava flow		James Ross Island	63.8745	58.079			15		48.36	1.47	15.45	2.49	8.13	0.18	9.29	8.78	3.22	1.03	0.25		0.03	0.02	1.06	0.15	99.91		5.4	24	168	582	47	133	49.9		14.8	432	24.3	163	22.3		0.39	129	19.3	41	5.19	21	4.91	1.65
JR71C	Dolerite volcanic plug		James Ross Island	63.852	58.059			15		47.7	1.63	15.91	2.03	7.75	0.18	8.32	8.43	4.09	1.49	0.5		0.04	0.09	1.57	0.25	99.98		6.6	24.7	180	533	39.8	101	45		19.7	574	25.2	230	41.3		0.46	183	29.3	57.7	6.73	26.3	5.86	1.94
JR91	Dolerite dyke		James Ross Island	63.8862	57.903			15		48.52	1.8	16.49	1.87	7.72	0.17	6.75	8.92	3.96	1.36	0.5		0.04	0.06	1.55	0.19	99.9		7.3	25.8	199	271	33.9	53	48.7		22.2	691	26.3	217	43.7		0.56	214	32.6	65.2	7.93	30.8	6.64	2.17
JR96	Dolerite lava flow		James Ross Island	63.8272	57.9365			15		48.26	1.71	16.47	2.17	8.23	0.18	7.55	9.59	3.42	1.02	0.37		0.04	0.02	0.68	0.1	99.8		4.6	26.1	179	432	40.6	65	57.3		11.3	475	25.8	172	24.5		0.2	108	20.2	44.4	5.39	22	5.25	1.87
JR100	Dolerite lava flow		James Ross Island	63.8177	57.9417			15		47.58	1.56	16.01	2.05	8.65	0.18	8.79	8.61	3.44	1.16	0.5		0.04	0.02	0.92	0.35	99.86		7	25	153	493	43.9	137	51.6		11.9	559	25.9	180	29.4		0.3	151	23.7	49.5	5.92	23.2	5.37	1.77
JR105	Dolerite volcanic plug		James Ross Island	63.809	57.9167			15		48.28	1.43	15.38	1.91	8.74	0.19	9.48	8.33	3.55	0.93	0.31		0.03	0.04	1	0.24	99.84		6.1	23.8	164	599	45.5	144	47.7		13.5	397	22.7	146	23.6		0.48	122	15.5	33.5	4.18	17.3	4.34	1.46
		Hidden Lake	James Ross Island	64.0333	58.3			1		48.1	1.78	15.1		10.5	0.16	8.9	8.2	3.34	1.2	0.38						97.66			19	176	276		166	41	92	17	506	24	154	27
		Hidden Lake	James Ross Island	64.0333	58.3			1		47.9	2.01	16.1		10	0.17	7.2	9.9	3.56	0.93	0.38						98.15			27	207	178		75	39	83	11	510	25	168	29
		Dreadnought	James Ross Island	64	57.8333			1		48.5	2.09	16		9.8	0.16	7.6	8.9	3.39	1.13	0.47						98.04			28	191	207		94	48	85	13	607	24	191	36
		Dreadnought	James Ross Island	64	57.8333	6.643	0.102	1		48.2	1.89	15.7		10.4	0.16	7.9	9.2	3.37	1.01	0.49						98.32			27	180	256		115	50	82	12	611	26	178	40
4M18		Dreadnought	James Ross Island	64	57.8333			1
		Massey	James Ross Island	63.95	57.9667			1		50.2	1.84	16.4		9.5	0.15	6.7	8.3	3.83	1.59	0.49						99			23	169	188		96	37	90	19	701	24	203	41
		Massey	James Ross Island	63.95	57.9667			1		47.1	1.71	15.4		10.9	0.17	8.1	8.4	3.34	0.83	0.35						96.3			24	159	223		146	58	93	10	453	24	162	38
		Massey	James Ross Island	63.95	57.9667			1		47.4	1.95	15.7		10.2	0.16	8.6	8.4	3.64	1.44	0.63						98.12			22	169	228		157	56	87	17	742	25	226	41
		Massey	James Ross Island	63.95	57.9667			1		48.5	2.04	16.1		10.6	0.17	8.4	9.5	3.57	1.19	0.5						100.57			29	197	239		116	49	81	13	618	26	180	39
		Conico	James Ross Island	63.9333	58.1333			1		50.4	1.87	16.3		9.7	0.16	6.8	9.2	3.58	1.37	0.36						99.74			30	195	184		86	44	87	25	481	28	164	28
		Ventisca	James Ross Island	63.95	58.0667			1		47.1	1.71	15.1		10.7	0.16	10.3	8	2.58	1.13	0.42						97.2			20	149	313		200	48	88	10	686	22	174	28
		Kotick	James Ross Island	64.0167	58.3667			1		46.8	1.75	15.1		10.5	0.16	10	8.5	2.96	0.89	0.33						96.99			26	167	304		180	42	90	13	510	22	134	24
		Kotick	James Ross Island	64.0167	58.3667			1		48.4	1.55	14.9		10.9	0.17	9.2	8.6	3.11	0.72	0.28						97.83			20	166	272		180	52	90	11	359	25	129	17
		Villar Fabre	James Ross Island	64.1	58.3667			1		48.3	1.69	15.3		10.6	0.15	9.1	8	3.27	1.01	0.38						97.8			22	146	233		177	44	101	10	482	24	142	24
		Villar Fabre	James Ross Island	64.1	58.3667			1		48.4	1.59	15.5		10.8	0.16	8.9	7.9	3.16	0.92	0.36						97.69			21	154	231		162	51	99	9	446	22	141	25
		Villar Fabre	James Ross Island	64.1	58.3667			1		47.9	1.64	15		11.1	0.17	8.6	7.8	3.43	1.05	0.37						97.06			19	151	226		168	41	99	13	475	24	142	24
		Villar Fabre	James Ross Island	64.1	58.3667			1		49.8	1.77	15.8		10.4	0.15	7.8	7.9	3.71	1.28	0.54						99.15			13	150	199		145	47	97	12	653	21	197	38
		Villar Fabre	James Ross Island	64.1	58.3667			1		48.2	1.74	15.1		12	0.18	9.1	8	3.27	0.95	0.21						98.75			25	148	225		170	35	90	10	395	19	139	23
5M117		Villar Fabre	James Ross Island	64.1	58.3667	3.94	0.085	1
		Sta Marta	James Ross Island	63.9	57.9			1		47.2	1.73	15.4		10.3	0.17	8.5	7.8	3.74	1.38	0.52						96.74			17	151	237		191	47	92	11	593	22	179	34
		Dobson	James Ross Island	64.0333	57.9333			1		48	1.56	15.5		10.9	0.17	9.5	8.7	3.11	0.82	0.32						98.58			30	185	295		189	53	85	13	435	22	120	19
		Dobson	James Ross Island	64.0333	57.9333			1		47.8	1.65	15.2		10.6	0.17	9.3	8.7	3.27	0.91	0.37						97.97			27	195	294		188	59	87	13	431	25	131	21
		Dobson	James Ross Island	64.0333	57.9333			1		48.3	1.64	15.4		11	0.17	8.7	8.6	3.37	0.88	0.36						98.42			23	189	260		164	61	88	15	433	25	135	24
		Ekelof	James Ross Island	64.2	57.2333			1		46.1	2.12	14.6		10.9	0.16	9.4	8.2	4.03	1.17	0.96						97.64			18	137	288		206	47	98	11	1383	21	296	91
		Coley	James Ross Island	64.1833	57.1667			1		48.3	2.11	15.7		10.7	0.16	7.6	9.5	3.5	1.05	0.38						99			26	211	224		86	21	90	11	536	25	149	26
		Marina	James Ross Island	64.1667	57.3667			1		48.9	1.99	15.4		10.4	0.16	8.9	8	4.1	1.57	0.63						100.05			23	165	288		132	29	93	17	728	23	206	43
		Marina	James Ross Island	64.1667	57.3667			1		48.5	2	15.3		10.4	0.16	9	7.9	3.99	1.56	0.62						99.43			22	177	288		138	34	87	17	720	23	205	43
		Marina	James Ross Island	64.1667	57.3667			1		48.8	1.95	15.3		10.2	0.15	8.9	7.8	4.35	1.65	0.64						99.74			21	185	282		135	29	91	17	732	23	208	43
		Elba	James Ross Island	64.25	57.5			1		48.7	2.44	18.2		10.4	0.16	4.7	7.6	4.89	1.55	0.75						99.39			16	126	10		12	29	78	13	945	29	254	55
		Elba	James Ross Island	64.25	57.5			1		48.8	2.45	18.4		10.2	0.16	4.8	7.4	5.32	1.97	0.84						100.34			17	151	10		17	27	82	17	911	28	250	55
		Elba	James Ross Island	64.25	57.5			1		48.5	2.46	18.3		10.8	0.16	4.6	7.3	4.93	1.82	0.84						99.71			18	121	10		17	21	86	16	917	29	254	55
		Paulet Island	James Ross Island	63.5833	55.7667			1		48.2	2.26	16.9		9.7	0.16	7.7	9.3	4.21	1.4	0.81						100.64			28	185	180		99	29	74	17	951	28	225	45
		Paulet Island	James Ross Island	63.5833	55.7667			1		47.4	2.26	16.9		9.6	0.16	6.6	8.9	4.16	1.43	0.75						98.16			23	187	102		69	31	75	17	940	30	229	47
		Paulet Island	James Ross Island	63.5833	55.7667			1		46.9	2.26	16.7		9.5	0.16	6.9	9.1	4.3	1.37	0.75						97.94			23	204	114		78	41	81	16	943	29	216	46
		Paulet Island	James Ross Island	63.5833	55.7667			1		47.8	2.3	17		9.3	0.16	6.7	9.2	4.33	1.44	0.86						99.09			22	191	115		74	43	75	16	937	28	228	48
PAI-01		Paulet Isl.		63.5797	55.7886			16		47.5842	2.39211	17.2827		9.79135	0.164155	6.61781	9.54988	4.19162	1.49701	0.929177						100			25	214	100	35		40	150	17	962	29	227	44	20		227	39	76.4	8.35	31.5	6.7	2.33
PAI-02A		Paulet Isl.		63.5797	55.7886			16		46.9762	2.32036	16.6205		9.7263	0.157468	7.81243	9.78332	4.11448	1.42229	1.06672						100			26	216	220	40		30	140	15	975	26	216	44	20		215	39.2	76.1	8.41	30.6	6.7	2.37
PAI-02B-1		Paulet Isl.		63.5797	55.7886			16		47.3253	2.37799	17.1313		9.84528	0.162136	6.46504	9.62618	4.23185	1.4888	1.34603						100			25	220	120	35		40	140	16	972	29	230	45	20		227	40.1	77.8	8.6	32.4	6.9	2.41
PAI-02B-2		Paulet Isl.		63.5797	55.7886			16		46.6458	2.22366	15.6778		10.3622	0.161164	9.08843	9.46584	3.8557	1.38724	1.13223						100			26	205	320	44	70	40	150	14	959	27	212	42	19		214	38	73	8.04	29.9	6.5	2.22
PAI-03		Paulet Isl.		63.5797	55.7886			16		47.4806	2.22046	16.1126		9.6501	0.147962	8.69406	9.38796	4.05111	1.34697	0.908183						100			23	205	430	52	120	70	180	18	944	26	202	44	21		215	45.3	85.9	8.96	32.6	7	2.42
PAI-04A		Paulet Isl.		63.5797	55.7886			16		48.1018	2.31003	17.3964		9.70666	0.157594	6.87314	9.18113	4.03644	1.38276	0.854059						100			25	208	120	37	60	70	90	16	964	26	212	48	21		230	40.4	77.9	8.9	34	7.1	2.33
PAI-04B		Paulet Isl.		63.5797	55.7886			16		48.0964	2.30271	17.1297		9.76923	0.164628	7.27281	8.95035	3.90731	1.46915	0.937755						100			24	203	130	38	80	40	100	18	955	25	208	51	21		228	39.3	76.4	8.56	32.8	6.9	2.29
PAI-05A		Paulet Isl.		63.5797	55.7886			16		47.9899	2.36239	17.4841		9.52165	0.156544	6.79035	9.24016	4.15756	1.46379	0.833546						100			24	216	110	37	70	40	90	17	985	26	214	53	21		229	39.5	76.9	8.82	33.7	7.1	2.38
PAI-05B		Paulet Isl.		63.5797	55.7886			16		48.2016	2.2728	17.0028		9.61684	0.157621	7.19974	9.28441	3.9863	1.43385	0.844037						100			25	211	130	38	80	30	90	16	963	26	208	47	20		225	38.8	75.6	8.63	32.2	6.9	2.26
		Cockburn Island	James Ross Island	64.2	56.9			1		48	1.82	16		10.5	0.16	7	8.6	3.69	1.16	0.4						97.33			24	173	180		96	19	85	16	536	23	163	26
		Cockburn Island	James Ross Island	64.2	56.9			1		48.8	1.86	16.4		10.3	0.16	6.7	8.7	3.59	1.22	0.43						98.16			25	177	150		77	29	81	16	547	25	170	27
CK3		Cockburn Island	James Ross Island	64.2	56.9	2.781	0.032	1
DJ.855.1		Cockburn Island	James Ross Island			2.9	0.4	17
DJ.856.1		Cockburn Island	James Ross Island					17
DJ.856.2		Cockburn Island	James Ross Island			4.7	0.2	17
DJ.856.3		Cockburn Island	James Ross Island			4.9	0.4	17
CP-01		Cape Purvis		63.5833	55.9667			16		48.8916	1.80579	16.8613		10.8106	0.164382	7.94111	8.75094	2.93712	1.30539	0.531825						100			22	171	200	42	120	50	30	14	532	19	103	19	15		150	22.3	42.2	5.35	18.4	4	1.42
CP-02		Cape Purvis		63.5833	55.9667			16		47.4721	1.63253	14.8007		11.4045	0.171136	12.5189	7.52998	2.93524	1.04756	0.487478						100			25	177	370	56	280	50	90	14	582	21	151	21	16		153	19.5	39.6	4.96	18.2	3.9	1.44
CP-03		Cape Purvis		63.5833	55.9667			16		48.9144	1.86531	16.8418		10.0668	0.15611	7.49526	8.85622	3.8427	1.34094	0.620436						100			27	202	310	51	150	70	170	24	691	24	175	33	21		183	33.3	65.1	6.81	25	5.6	1.95
CP-04		Cape Purvis		63.5833	55.9667			16		49.0187	1.76035	16.3031		9.36021	0.17374	10.3042	8.09694	3.29997	1.25661	0.426155						100			25	170	250	39	150	40	70	13	595	21	138	18	13		165	19.8	39.1	4.17	16.6	3.6	1.28
CP-05		Cape Purvis		63.5833	55.9667			16		48.2226	1.80357	16.315		10.8094	0.172072	9.03908	8.45489	3.31398	1.27461	0.594816						100			26	189	250	43	90	50	130	15	616	24	177	27	18		168	24.1	48.1	5.33	20.4	4.6	1.62
CP-06		Cape Purvis		63.5833	55.9667			16		48.0455	1.87559	16.7079		10.4543	0.166268	8.10051	9.12448	3.60924	1.30784	0.608299						100			28	210	220	42	60	50	130	14	699	25	180	31	19		181	27.5	54.7	6.03	22.6	5	1.77
CP-07		Cape Purvis		63.5833	55.9667			16		47.7802	2.19005	15.5521		10.4953	0.168076	8.42406	9.94282	3.53365	1.37701	0.536629						100			28	237	270	44		60	150	19	623	26	176	32	19		196	24.6	50.9	5.86	22.7	5.3	1.88
CP-08		Cape Purvis		63.5833	55.9667			16		49.1131	1.86326	17.3567		10.3054	0.167086	6.20749	9.49857	3.72652	1.21517	0.546826						100			30	219	160	37		50	130	17	613	26	168	27	20		174	24.5	49.4	5.54	21.2	5	1.75
KG.3719.17			Alexander Island			4		9
KG.3719.18			Alexander Island								16
KG.3625.2			Alexander Island			4		9
KG.3603,5	Basanite		Alexander Island, Hornpipe Heights			4		9		46.11	2.93	14.78	1.36	9.12	0.16	9.2	8.66	4.25	2.46	0.77						99.04					178		152			30	868	27	259	70			320	43.36	79.5		43.4	6.99	2.72
KG.3608,6	Basanite		Alexander Island,Hornpipe Heights			2.5		12		45.51	3.2	14.77	1.36	9.13	0.15	9.96	9.12	4.07	2.52	0.73						100.31					167		121			33	948	28	287	83			325	44.96	72.69		36.39	7.83	2.73
KG.3605,1	Basanite		Alexander Island, Hornpipe Heights			2.5		12		45.41	3.32	14.23	1.37	9.15	0.15	11.24	9.14	3.93	2.4	0.74						100.19					289		246			24	824	26	229	66			283	41.87	71.15		35.89	5.05	2.3
KG.3604,6	Basanite		Alexander Island			2.5		12		43.85	3.2	14.77	1.36	9.13	0.15	9.96	9.12	4.07	2.51	0.73						98.65					197		169			27	859	26	251	72			312	43.85	86.57		45.44	8.11	2.77
KG.3612,5	Basanite		Alexander Island, Hornpipe Heights			2.5		12		45.07	3.26	14.49	1.37	9.19	0.15	10.36	9.3	3.89	2.44	0.75						99.87					223		195			25	838	25	238	68			298	40.01	72.35		35.82	5.64	2.36
KG.3619,1	Basanite		Alexander Island, Rothschild Island			5.5		12		46.9	2.65	14.42	1.15	8.41	0.15	9.19	10.03	3.88	2.21	0.85						99.86					360		201			26	837	26	267	72			263	53.94	91.74		41.25	8.25	2.55
KG.3609,9	Tephrite		Alexander Island, Mussorgsky Peaks			4		9, 12		46.95	2.85	15.58	1.45	9.7	0.17	8.01	8.36	4.24	1.83	0.68						100.25					234		138			12	838	26	283	42			113	36.61	62.19		42.27	7.35	2.39
KG.3609,1	Tephrite		Alexander Island, Mussorgsky Peaks					12		46.78	2.8	15.43	1.44	9.64	0.17	8.17	8.27	3.72	1.83	0.67						99.05					258		157			12	824	26	277	43			127	34.52	72.55		36.84	7.17	2.38
KG.3616,5	Tephrite		Alexander Island, Mussorgsky Peaks			4		9, 12		48.6	2.42	16.27	1.38	9.26	0.17	6.16	7.18	4.67	1.81	0.83						99.38					188		85			14	938	26	370	56			176	49.37	87.28		42.15	7.89	2.2
KG.3620,7	Olivine-Basalt		Alexander Island, Mussorgsky Peaks			2.5		12		50.67	1.86	15.16	1.24	8.29	0.14	7.94	8.56	3.31	1.53	0.38						99.05					294		108			19	475	22	173	24			172	23.9	40.73		19.77	4.99	1.16
KG.3620,8	Olivine-Basalt		Alexander Island, Mussorgsky Peaks			2.5		12		50.5	1.86	15.25	1.23	8.26	0.14	7.76	8.63	3.3	1.55	0.38						98.56					284		113			19	475	23	177	26			178	21.73	38.61		21.29	4.97	1.63
KG.3621,2	Olivine-Basalt		Alexander Island, Mussorgsky Peaks			2.5		12		51.15	1.88	15.3	1.24	8.28	0.14	7.68	8.63	3.33	1.58	0.38						99.25					284		105			19	479	22	179	26			174	21.59	38.25		25.02	3.91	1.72
KG.3624,6	Olivine-Basalt		Alexander Island, Mussorgsky Peaks			2.5		12		51.5	1.97	15.81	1.22	8.19	0.14	6.82	8.87	3.49	1.72	0.41						99.64					229		76			22	512	24	187	27			200	28.32	51.34		26.5	6.25	1.97
KG.3633,3	Olivine-Basalt		Alexander Island, Mussorgsky Peaks			2.5		12		51.26	1.96	15.88	1.21	8.1	0.14	6.78	8.84	3.43	1.69	0.41						99.6					228		76			25	522	23	184	28			195	23.52	45.69		20.43	5.39	1.65
KG.3627,8	Alkali basalt		Alexander Island, Mussorgsky Peaks			4		9, 12		49.7	2.21	16.71	1.23	8.23	0.13	5.26	9.89	3.82	1.71	0.5						99.53					107		25			15	621	23	196	32			138	22.9	41.01		28.66	5.87	2.08
KG.3627,1	Alkali basalt		Alexander Island, Mussorgsky Peaks			1		12		49.32	2.17	16.57	1.2	8.4	0.13	5.36	10.36	3.82	1.06	0.52						100.19					99		34			11	611	25	186	30			166	20.8	43.6		24.7	5.47	1.91
KG.2717,6	Lava		Alexander Island, Staccato Peaks			80		14		57.4	0.81	15.6	7.81			6.3	6.6	2.6	1.7	0.14						98.95			0	0	80		9		63	43	472	25	199	7	22		533	19	47
KG.4357,6B	Pyroclastic		Alexander Island, Colbert Mountains			62		14		75.69	0.17	12.96	5.28		0.04	0.3	0.71	2.74	5.42	0.03						100.49			2	10	10	1.1	1	1	30	194	82	18	126	10	13	3.22	811	35.2	67		22.9	3.9	0.52
KG.4361,2	Plutonic		Alexander Island, Colbert Mountains			62		14		63.58	0.59	15.94	1.41		0.1	2.52	5.18	3.41	3.06	0.11						100.42			15.9	111	33	8.7	12	97	59	71	458	24	158	7	19	1.71	662	19.6	35		23.2	5.08	1.04
KG.4367,1A	Lava		Alexander Island, Colbert Mountains			62		14		54.59	0.94	18.27	7.47		0.16	4.15	6.81	2.82	0.7	0.15						99.55			23.4	200	35	18.1	9	20	81	31	487	23	152	8	21	1.43	216	19.7	44		23.5	5.12	1.46
KG.4373,2B	Lava		Alexander Island, Colbert Mountains			62		14		70.91	0.3	12.49	2.2		0.06	0.48	6.02	0.93	2.64	0.03						100.01			6.4	20	13	2.6	3	3	33	148	355	30	205	10	18	10.6	461	30.8	61		31.7	6.24	1.28
KG.4374,1A	Lava		Alexander Island, Colbert Mountains			62		14		57.19	0.86	17.81	7.08		0.13	3.25	7.47	2.85	1.91	0.2						100.03			20.9	170	21	16.6	7	21	74	56	421	23	161	7	19	0.94	367	21.9	44		25.3	5.47	1.47
KG.4381,3C	Pyroclastic		Alexander Island, Colbert Mountains			62		14		74.07	0.09	12.34	0.97		0.03	0.04	2.17	3.42	2.39	0.01						99.95			0	0	10	0.5	1	0	28	85	109	20	88	7	15	32.5	600	31.7	68		26.5	5.09	0.41
KG.4386,1B	Dyke		Alexander Island, Colbert Mountains			62		14		47.53	1.01	17.11	9.44		0.17	5.89	8.77	1.96	1.3	0.16						99.98			0	286	54	26	7	13	125	69	291	16	98	6	19	11.5	196	11.2	20		13.9	3.22	1.18
KG.4387,1	Lava		Alexander Island, Colbert Mountains			62		14		64.94	0.57	16.2	4.81		0.09	1.49	4.36	3.73	2.74	0.13						100.06			0	78	21	9	5	7	67	88	307	21	177	9	20	5.14	641	29.3	55		23.9	4.88	1.23
KG.4400,1	Lava		Alexander Island, Elgar Uplands			52		14		51.71	0.77	14.73	8.56		0.15	7.73	9.14	2.43	1.49	0.2						100.41			28.1	208	406	36.3	131	66	80	36	692	21	113	5	17	0.64	403	25.2	49		28.5	5.62	1.51
KG.2081,2	Lava		Alexander Island, Elgar Uplands			52		14		52.7	0.88	14.5	9.3		0	9.5	8.89	2.6	1.65	0						100.02				0	430		199	0	64	49	404	22	133	9	22		385	18	43		22
KG.2168,2	Lava		Alexander Island, Elgar Uplands			52		14		52.95	0.81	14.1	8.08		0.17	7.43	9.97	1.8	1.66	0.17						100.4				184	489		242	41	67	44	374	19	133	6	18		372	12	49		21
KG.4411,2A	Lava		Alexander Island, Elgar Uplands			52		14		57.3	0.78	16.59	6.24		0.12	2.87	7.57	3.09	1.87	0.2						99.73			21.6	158	67	15.6	12	14	75	59	431	21	136	7	20	1.63	492	20.9	35		21.2	4.41	1.23
KG.4417,1C	Lava		Alexander Island, Elgar Uplands			52		14		52.78	0.61	15.1	7.42		0.19	8.23	7.02	2.34	3.87	0.1						100.1				210	310		97	35	74	175	251	22	83	5	16		255	2	20		21
KG.4418,1	Lava		Alexander Island, Elgar Uplands			52		14		62.06	0.71	15.72	5.74		0.1	2.9	5.25	2.91	2.96	0.1						99.63			17.8	125	45	14.2	13	16	70	104	351	25	174	7	20	2.21	583	29.5	58		27.7	5.68	1.22
KG.4422,3	Lava		Alexander Island, Elgar Uplands			52		14		55.83	0.74	15.56	7.35		0.12	5.86	7.85	2.12	2.01	0.1						99.46				180	253		75	36	65	53	278	21	127	6	19		418	16	30		11
KG.4425,1	Lava		Alexander Island, Elgar Uplands			52		14		56.41	0.7	15.23	7.29		0.13	5.58	8.36	2.32	1.95	0.1						100.81				169	171		54	37	63	60	426	22	134	6	17		419	19	34		33
KG.2015,1	Lava		Alexander Island, Finlandia Foothills			46	7	14		59.2	0.8	17.2	7.61			4.6	6.7	3.3	1.82	0.12						101.35			20.7	0	80	41.4	21	0	72	58	317	23	156	6	20	1.14	533	17.1	32		15.9	3.59	1.03
KG.2010,3	Lava		Alexander Island, Geode Nunataks					14		55.1	0.83	16	8.83			5.5	8.77	2.9	2.01	0.18						100.12					220		65		65	67	450	24	162	4	20		445	20	43
KG.4402,1C	Lava		Alexander Island, Geode Nunataks					14		55.84	0.78	18.72	7.83		0.14	2.75	7.93	3.19	1.7	0.15						100.47			23.6	236	26	23.8	16	44	77	60	411	22	126	5	19	1.95	377	17.3	17		17.9	4.05	1.13
KG.4403,3A	Lava		Alexander Island, Geode Nunataks					14		53.74	1.07	18.58	7.94		0.13	2.89	8.55	3.43	1.97	0.25						100.39			21.4	223	31	23	29	82	80	54	491	26	159	6	19	1.13	552	23.5	51		26.6	5.72	1.5
KG.4403,4	Lava		Alexander Island, Geode Nunataks					14		45.18	0.68	14.54	8.56		0.23	4.27	14.01	1.94	0.36	0.16						99.76			32.5	261	394	32.7	100	52	77	6	496	19	100	4	18	0.54	280	17	36		19.7	4.24	1.18
KG.4403,5A	Lava		Alexander Island, Geode Nunataks					14		52.73	0.78	15.57	8.75		0.15	7.36	9.18	2.59	1.45	0.17						100.02			31.8	230	301	33.4	117	75	77	50	384	21	115	5	17	2.02	335	16.5	31		19.3	4.16	1.17
KG.4404,5A	Lava		Alexander Island, Geode Nunataks					14		52.92	0.96	17.44	8.95		0.15	5.11	8.63	2.88	1.2	0.14						99.61			31.6	244	90	25	26	37	89	38	378	21	107	7	17	0.8	335	14.6	42		16.6	3.94	1.19
KG.4323,1	Dyke		Alexander Island, Rouen Mountains					14		51.86	0.77	14.66	7.82		0.13	8.63	7.24	1.82	2.64	0.16						100.48				198	432		156	48	70	93	476	20	116	5	18		435	12	29		17
KG.4339,3	Dyke (5m)		Alexander Island, Rouen Mountains					14		54.25	0.74	14.97	7.96		0.14	8.49	8.32	2.5	1.49	0.2						100.28			0	216	457		159	43	75	86	374	22	125	8	19		273	15	41		24
KG.4751,3	Dyke (10m)		Alexander Island, Rouen Mountains					14		57.83	0.61	14.11	7.7		0.15	6.85	6.79	1.72	1.55	0.12						100.28				182	417		112	13	58	46	306	18	116	5	17		191	13	36		19
KG.4760,3	Dyke		Alexander Island, Rouen Mountains					14		56.63	0.71	14.4	6.75		0.06	7.47	8.15	3.1	0.41	0.19						100				247	305		37	15	40	12	499	21	124	4	19		171	16	39		21
KG.2331,5	Dyke		Alexander Island, Rothschild Island					14		58.91	0.62	14.18	7.58			6.24	5.74	2.96	2.37	0.12						101.24			0	0	70		14		160	54	457	24	162	5	19		498	13	33
References:
Ref.#1: Lawver et al 1995 Backarc basins
Ref.#2: Keller. R.A. (1991). Earth Planet. Sci. Letts. 111: 287-303
Ref.#3: Baker. P.E. (1975). BAS. Sci.Rep.. 78: 81pp
Ref.#4: Smellie et al. (1992). J.V.G.R. 49: 255-267
Ref.#5: Weaver et al. (1979). Contrib. Mineral. Petrol. 68: 151-169
Ref.#6: Tarney et al. (1982). Andesites
Ref.#7: Pallás et al. (2001): The Holocene																										0
Ref.#8: Keller et al. (2002): JGR107
Ref.#9: Hole (1993): Chem. Geol.109
Ref.#10:Keller & Fisk (1992): Ophiolites...:155-169
Ref.#11: Hole (1990): JVGR 40: 149-167
Ref.#12: Hole (1988): J.Geol.Soc.London 145
Ref.#13: Hole et al. (1995): Geol.Soc.Spec.Publ.81
Ref.#14: McCarron & Smellie 1998: J. Geol. Soc. London 155
Ref.#15: Kosler et al 2009- Chem Geol. 258, 207-218
Ref.#16: Kraus et al 2013 Andean Geol 40, 1-40
Ref.#17: Jonkers & Kelley, 1998 J Geol Soc London 155, 737-740
Ref.#18: Smellie 1987 JVGR 32, 269-285
[truncated: 19 more columns]
